# Supplementary material
Source: publisher figshare collection journal article supplement (https://karger.figshare.com/ndownloader/files/13674611)
Supplement: Supplementary file 1 [file 13674611]

**E-Table 1. EDS subtypes included in study.**

| **EDS subtypes** | **N ( = 24)** | **%** |
| --- | --- | --- |
| Classic type (I/II) | **7** | **29.2** |
| Hypermobil type (III) | **12** | **50.0** |
| Vascular type (IV) | **3** | **12.5** |
| Kypholscoliotic type (VI) | **0** | **0** |
| Arthrochalasis type (VII) | **2** | **8.3** |

**E-Table 2. List of diagnostic criteria fulfilled by the EDS cohort.**

| **Diagnostic criteria** | **N ( = 24)** | **%** |
| --- | --- | --- |
| **1.** Clinical Villefranche criteria + Gene analysis***** | **3** | **12.5** |
| **2.** Clinical Villefranche criteria + Electron microscopy study | **12** | **50** |
| **3.** Clinical Villefranche criteria + Biochemical urine analysis | **0** | **0** |
| **4.** Clinical Villefranche criteria only | **8** | **33.3** |
| **5.** Combination of 1-3* | **1** | **4.2** |

*Identified genes*: COL5A1* (n=1); *COL3A1* (n=1); *COL1A2* (n=1);

**E-Table 3. Medical centres of EDS diagnosis.**

| **Medical centre** | **N ( = 24)** | **%** |
| --- | --- | --- |
| University Children’s Hospital Zurich, Switzerland | **16** | **66.7** |
| University Hospital Heidelberg, Germany | **3** | **12.5** |
| University Medical Center Schleswig-Holstein, Germany | **2** | **8.3** |
| Other Hospitals | **3** | **12.5** |

**E-Table 4. List of countries of origin for EDS participants.**

| **Country** | **N ( = 24)** | **%** |
| --- | --- | --- |
| Switzerland | **16** | **66.7** |
| Germany | **3** | **12.5** |
| United States of America | **2** | **8.3** |

**E-Table 5. Diagnosis of OSA by EDS subtypes.**

| **EDS subtypes** | **OSA diagnosis** |
| --- | --- |
| Classic type (I/II) | **3 (42.9%)** |
| Hypermobil type (III) | **2 (16.7%)** |
| Vascular type (IV) | **3 (100%)** |
| Arthrochalasis type (VII) | **2 (100%)** |
